# Supplementary material for: Glucose Sensing Using Capacitive Biosensor Based on Polyvinylidene Fluoride Thin Film
Source: Biosensors (Basel). 2018 Jan 30;8(1):12. doi: 10.3390/bios8010012 (PMC5872060; doi:10.3390/bios8010012)
Supplement: Supplementary file 1 [file biosensors-08-00012-s001.pdf]

# Supplementary Material: Glucose Sensing Using Capacitive Biosensor Based on Polyvinylidene Fluoride Thin Film

Ambran Hartono<sup>1</sup>, Edi Sanjaya<sup>1</sup>, and Ramli Ramli<sup>2,\*</sup>

## 1. PVDF Thin Film Characterization

FTIR characterization has been used to confirm the  $\beta$  fraction of PVDF samples. The FTIR results of PVDF films for PVDF solution concentrations of 10%, 15% and 20% are shown in Figure S1. It appears that for a sample with a PVDF solution concentration of 20% it has a larger  $\beta$  fraction compared to the other two concentrations. The  $\alpha$  phase appears in wavelength regions 615, 760, 973, 1230 and 1400  $\text{cm}^{-1}$ ,  $\gamma$  phase is detected at 1230  $\text{cm}^{-1}$ . Meanwhile, for  $\beta$  phase is appearing in 840, 880, 1075 and 1170  $\text{cm}^{-1}$ . The  $\beta$  fraction of the PVDF sample with solution concentration 10 %, 15% and 20% are; 31%, 39% and 44.5%, respectively.

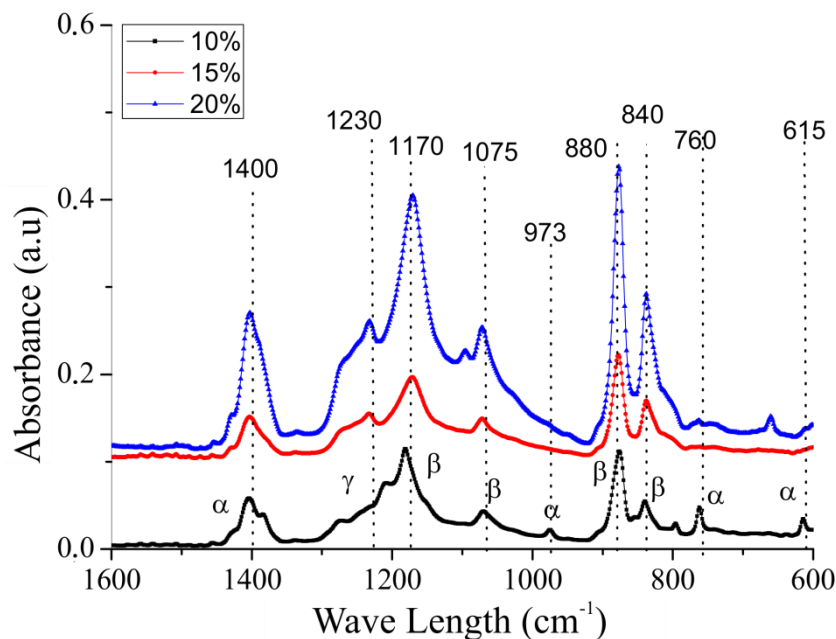

**Figure S1.** The FTIR results for PVDF film with different solution concentrations.

Furthermore, XRD characterization was performed on a PVDF sample with a concentration of 20% (S#3) for annealing temperature of 70°C, 80°C, 90°C, 100°C, and 110°C (referred as SS#1, SS#2, SS#3, SS#4, and SS#5), as shown in Figure S2. The XRD results showed that the optimum peak was obtained in samples with annealing temperature of 110°C. It was found that the degree of crystalline PVDF film was increased by increasing the annealing temperature. The values of the  $\beta$  fraction of PVDF samples for annealing temperatures of 70°C, 80°C, 90°C, 100°C, and 110°C were 37%, 38%, 44%, 50% and 58%, respectively.

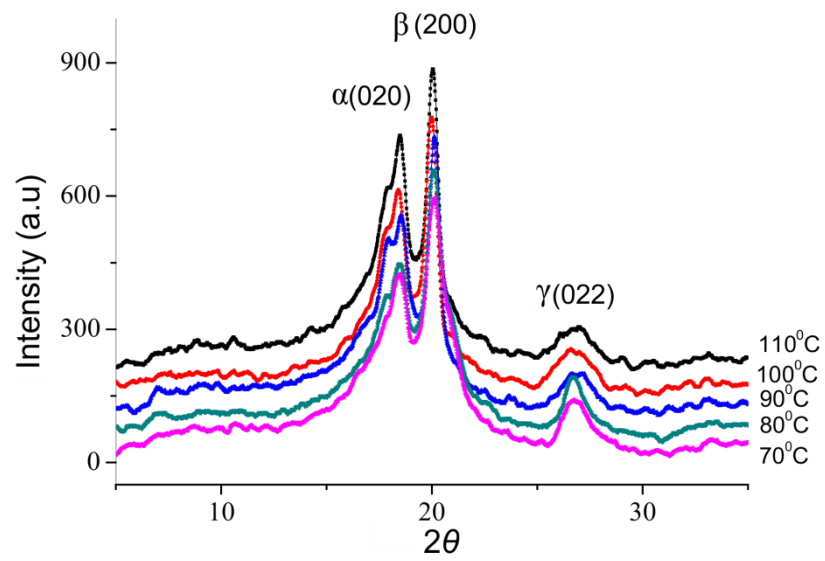

**Figure S2.** The XRD results for PVDF film with different annealing temperature.
